# Supplementary material for: Catalytic asymmetric construction of C-4 alkenyl substituted pyrazolone derivatives bearing multiple stereoelements
Source: Royal Society of Chemistry journal article supplement (doi:10.1039/d1cc01123e), 2021-01-01
Supplement: d1cc01123e1.pdf [file d1cc01123e1.pdf]

## Catalytic asymmetric construction of C-4 alkenyl substituted pyrazolone derivatives bearing multiple stereoelements

Wande Zhang,<sup>a</sup> Shiqiang Wei,<sup>a</sup> Wenyao Wang,<sup>a</sup> Jingping Qu<sup>a</sup> and Baomin Wang<sup>\*,a</sup>

<sup>a</sup> State Key Laboratory of Fine Chemicals, Department of Pharmaceutical Sciences, School of Chemical Engineering, Dalian University of Technology, Dalian 116024, People's Republic of China. E-mail: bmwang@dlut.edu.cn

### Content

|                                                                                        |     |
|----------------------------------------------------------------------------------------|-----|
| 1. General information .....                                                           | S1  |
| 2. General procedures for preparation of pyrazol-5-ones <sup>[1]</sup> .....           | S1  |
| 3. General Procedure for the synthesis of ortho-alkynyl naphthols <sup>[2]</sup> ..... | S1  |
| 4. General Procedure for the synthesis of catalyst C5 <sup>[3]</sup> .....             | S2  |
| 5. General Procedure for the synthesis of racemic products 3 .....                     | S3  |
| 6. Experimental procedures and characterization of products 3 .....                    | S3  |
| 7. References .....                                                                    | S30 |
| 8. NMR spectra for compounds .....                                                     | S31 |

## 1. General information

Unless otherwise noted, materials were purchased from commercial suppliers and used without further purification. Column chromatography was performed on silica gel (200~300mesh). Diastereoisomeric ratios (dr) were determined by  $^1\text{H}$  NMR (400 MHz). Enantiomeric excesses (ee) were determined by HPLC using corresponding commercial chiral columns as stated at 30 °C with UV detector at 254 nm. Optical rotations were reported as follows:  $[\alpha]_D^{25}$  (c g/100 mL, solvent). All  $^1\text{H}$  NMR and  $^{19}\text{F}$  NMR spectra were recorded on a Bruker Avance II 400 MHz and Bruker Avance III 471 MHz respectively,  $^{13}\text{C}$  NMR spectra were recorded on a Bruker Avance II 101 MHz or Bruker Avance III 126 MHz with chemical shifts reported as ppm (in  $\text{CDCl}_3$ , TMS as internal standard). Data for  $^1\text{H}$  NMR are recorded as follows: chemical shift ( $\delta$ , ppm), multiplicity (s = singlet, d = doublet, t = triplet, m = multiplet, br = broad singlet, dd = doublet doublet, coupling constants in Hz, integration). HRMS (ESI) was obtained with a HRMS/MS instrument (LTQ Orbitrap XL<sup>TM</sup>). The absolute configuration of 3aj was assigned by the X-ray analysis.

## 2. General procedures for preparation of pyrazol-5-ones<sup>[1]</sup>



A mixture of  $\beta$ -keto acid ester **S1** (10 mmol) and anhydrous  $\text{K}_2\text{CO}_3$  (13 mmol) in dry acetone was stirred under argon atmosphere for five minutes. Then, alkyl iodide or corresponding benzyl bromide (13 mmol) was added carefully. The reaction was refluxed overnight. After filtration, the solvent was evaporated. The crude mixture purified by flash chromatography on silica gel with mixture of hexane/ethyl acetate (20:1) affording corresponding pure compound **S2**.

A mixture of **S2** (1.0 eq) and phenylhydrazine (1.0 eq) was refluxed in EtOH until full conversion. The solvent was removed and a residue was crystallized from  $\text{Et}_2\text{O}$ . Solid material was filtered affording corresponding pyrazol-5-ones **1**. NMR data fit with data published in the literature.

## 3. General Procedure for the synthesis of ortho-alkynyl naphthols<sup>[2]</sup>



Sulfuric acid (75 mmol) was added to a solution of 2-naphthol **S3** (7.2 g, 50 mmol) and potassium iodide (8.25 g, 1.0 eq) in methanol (200 mL) at 0 °C. When the white precipitate

formed, hydrogen peroxide (30% aqueous solution, 2.0 eq) was added. After 1.5 hours later, the mixture was filtered, and the filtrate was concentrated. The residue was dissolved in  $\text{CH}_2\text{Cl}_2$ , washed with  $\text{Na}_2\text{S}_2\text{O}_3$  aq and water, dried over  $\text{Na}_2\text{SO}_4$ . Then, the mixture was filtrated and the colature was evaporated on a rotary evaporator. This material was purified by flash chromatography (PE:EA = 50:1) to provide a white solid **S4**.  $\text{MOMCl}$  (1.2 g, 1.5 eq) was added to a mixture of **S4** (10 mmol) and  $\text{K}_2\text{CO}_3$  (5.52, 4.0 eq) in DMF (30 mL) at 25 °C. The mixture was then stirred at room temperature for about 1 h (determined by TLC), the mixture was filtered, quenched with water and extracted with diethyl ether. The organic phase was separated, washed with water and dried over  $\text{Na}_2\text{SO}_4$ . The crude product was purified by column chromatography on silica gel (PE:EA = 25:1) to afford the MOM protected product **S5**.

To a dry flask under argon atmosphere containing the MOM-protected product **S5** (10 mmol) was sequentially added  $\text{Et}_3\text{N}$  (20 mL), arylacetylene (11.0 mmol),  $\text{PdCl}_2(\text{PPh}_3)_2$  (70 mg, 1 mol%),  $\text{CuI}$  (38 mg, 2 mol%). The mixture was stirred for 6-8 h at 50 °C in oil bath. Then the mixture was filtered through a pad of celite. Removal of solvent under reduced pressure afforded a residue which is purified by chromatography on silica gel (PE:EA = 20:1) to afford the coupling product **S6**.

The above product **S6** (10 mmol) was dissolved in methanol (10 mL), and then hydrochloric acid (36%, 1.0 mL) was slowly added. The resulted mixture was stirred at room temperature until deprotection is complete (usually 4-6 h). The acid was diluted with water. The organic material was extracted with ethyl acetate, and dried over  $\text{Na}_2\text{SO}_4$ . Removal of solvent under reduced pressure afford a residue which is purified by chromatography on silica gel (PE:EA = 100:1) to afford compound **2** as a pale yellow solid. NMR data fit with data published in the literature.

#### 4. General Procedure for the synthesis of catalyst **C5** [3]



##### Step 1: synthesis of squaric ester monoamide intermediate

To a solution of dimethyl squarate (142 mg, 1.00 mmol) in MeOH (4 mL) was added a solution of 3,5-bis (trifluoromethyl) benzylamine (255 mg, 1.05 mmol) in MeOH (1 mL) and the mixture was stirred at room temperature for 48 h. The reaction mixture was filtered, and the filtrate was washed with 1 M HCl (10 mL), dried with  $\text{Na}_2\text{SO}_4$ , filtered again, and concentrated to afford 3-((3,5-bis(trifluoromethyl) benzyl) amino)-4-methoxycyclobut-3-ene-1,2-dione (309 mg, 87%) as a white solid. All spectroscopic data were identical to those reported in the literature.<sup>3</sup>

##### Step 2: coupling to final squaramide **C5**

To a solution of previously obtained material (309 mg, 0.87 mmol) in CH<sub>2</sub>Cl<sub>2</sub> (10 mL) at room temperature was added a solution of 9-amino-(9-deoxy) epiquinine (236 mg, 0.73 mmol) in MeOH (3 mL). After stirring the mixture for 24 h, the solvent was evaporated under reduced pressure and the residue was purified by non acid column chromatography (50:50 Hex:EtOAc) to afford the desired squaramide **C5** as a white solid (227 mg, 0.35 mmol, 50% yield). All spectroscopic data were identical to those reported in the literature.<sup>3</sup>

## 5. General Procedure for the synthesis of racemic products 3

The racemic products **3** were synthesized using 1,4-Diazabicyclo [2.2.2] octane (DABCO) or quinine/quinidine as catalyst. In a Schlenk tube, pyrazol-5-ones **1** (0.12 mmol), DABCO (0.10 mmol) or quinine/quinidine = 1:1 (0.10 mmol) were added into CHCl<sub>3</sub> (1 mL) under argon atmosphere. Then ortho-alkynyl naphthol **2** (0.10 mmol) was added in one portion and the reaction solution was stirred at 25 °C. After the reaction was complete (monitored by TLC), the crude product was purified by column chromatography on silica gel (unless otherwise noticed, petroleum ether/EtOAc = 10/1 was used as the eluent) directly to give the racemic products **3**.

## 6. Experimental procedures and characterization of products 3

Table S1. Optimization of reaction conditions<sup>a</sup>



| Entry <sup>a</sup> | Cat.      | solvent           | T (°C) | t (h) | Yield <sup>b</sup> (%) | ee <sup>c</sup> (%) |
|--------------------|-----------|-------------------|--------|-------|------------------------|---------------------|
| 1                  | <b>C1</b> | CHCl <sub>3</sub> | 25     | 96    | 70                     | 5                   |
| 2                  | <b>C2</b> | CHCl <sub>3</sub> | 25     | 72    | 46                     | 83                  |
| 3                  | <b>C3</b> | CHCl <sub>3</sub> | 25     | 14    | 88                     | 88                  |
| 4                  | <b>C4</b> | CHCl <sub>3</sub> | 25     | 48    | 54                     | 45                  |
| 5                  | <b>C5</b> | CHCl <sub>3</sub> | 25     | 5     | 99                     | 97                  |

|                 |            |                                 |    |     |    |     |
|-----------------|------------|---------------------------------|----|-----|----|-----|
| 6               | <b>C6</b>  | CHCl <sub>3</sub>               | 25 | 48  | 0  | -   |
| 7               | <b>C7</b>  | CHCl <sub>3</sub>               | 25 | 48  | 0  | -   |
| 8               | <b>C8</b>  | CHCl <sub>3</sub>               | 25 | 48  | 0  | -   |
| 9               | <b>C9</b>  | CHCl <sub>3</sub>               | 25 | 48  | 0  | -   |
| 10              | <b>C10</b> | CHCl <sub>3</sub>               | 25 | 36  | 82 | -64 |
| 11              | <b>C11</b> | CHCl <sub>3</sub>               | 25 | 42  | 98 | 72  |
| 12              | <b>C12</b> | CHCl <sub>3</sub>               | 25 | 40  | 84 | 74  |
| 13              | <b>C13</b> | CHCl <sub>3</sub>               | 25 | 90  | 49 | 11  |
| 14              | <b>C14</b> | CHCl <sub>3</sub>               | 25 | 90  | 46 | 17  |
| 15              | <b>C5</b>  | CH <sub>2</sub> Cl <sub>2</sub> | 25 | 5   | 99 | 96  |
| 16              | <b>C5</b>  | Toluene                         | 25 | 120 | 70 | 77  |
| 17              | <b>C5</b>  | CH <sub>3</sub> CN              | 25 | 120 | 56 | 89  |
| 18              | <b>C5</b>  | THF                             | 25 | 120 | 61 | 74  |
| 19              | <b>C5</b>  | CH <sub>3</sub> OH              | 25 | 120 | 19 | 70  |
| 20              | <b>C5</b>  | 1,4-dioxane                     | 25 | 120 | 44 | 85  |
| 21              | <b>C5</b>  | CHCl <sub>3</sub>               | 10 | 10  | 98 | 98  |
| 22              | <b>C5</b>  | CHCl <sub>3</sub>               | 40 | 3.5 | 99 | 95  |
| 23 <sup>d</sup> | <b>C5</b>  | CHCl <sub>3</sub>               | 25 | 7   | 99 | 96  |

<sup>a</sup>The reaction was carried out on a 0.1 mmol scale with **1a** (0.12 mmol), **2a** (0.10 mmol), and **catalyst** (10 mol%) in Solvent (1.0 mL) under Ar. dr > 20 / 1 for all reactions, and the dr was determined by <sup>1</sup>H NMR of the crude reaction mixture. <sup>b</sup>Isolated Yield. <sup>c</sup>The ee was determined by chiral HPLC. <sup>d</sup>The load of catalyst was 5 mol%.

### General procedure: synthesis of compound 3



In a Schlenk tube, pyrazol-5-ones **1** (0.24 mmol), **C5** (0.02 mmol) were added into CHCl<sub>3</sub> (2 mL) under argon atmosphere. Then ortho-alkynyl naphthol **2** (0.20 mmol) was added in one portion and the reaction solution was stirred at 25 °C. After the reaction was complete (monitored by TLC), the crude product was purified by column chromatography on silica gel (unless otherwise noticed, petroleum ether/EtOAc = 10/1 was used as the eluent) directly to give the product **3**.



Prepared according to the procedure within 5 h as white solid (113 mg, 99% yield, dr > 20:1); mp 170-173 °C; [ $\alpha$ ]<sub>D</sub><sup>18</sup> = -217.9 (*c* 1.35, CH<sub>2</sub>Cl<sub>2</sub>); <sup>1</sup>H NMR (400 MHz, CDCl<sub>3</sub>)  $\delta$  10.32 (s, 1H), 8.12–7.68 (m, 6H), 7.61–7.31 (m, 7H), 7.23–7.08 (m, 3H), 6.98–6.72 (m, 10H), 6.63 (s, 1H), 3.55 (d, *J* = 13.6 Hz, 1H), 3.16 (d, *J* = 13.6 Hz, 1H). <sup>13</sup>C NMR (101 MHz, CDCl<sub>3</sub>)  $\delta$  179.5, 162.5, 154.6, 137.9, 137.0, 135.2, 133.8, 131.5, 131.3, 131.3, 130.3, 130.1, 129.4, 129.3, 129.1, 128.9, 128.6, 128.5, 128.3, 128.2, 128.1, 127.6, 126.6, 126.2, 125.6, 123.4, 120.5, 120.4, 115.0, 67.9, 39.5; **HRMS** (ESI)

m/z Calcd. for C<sub>40</sub>H<sub>31</sub>N<sub>2</sub>O<sub>2</sub> ([M+H]<sup>+</sup>) 571.2380, Found 571.2382; **Enantiomeric excess** was determined to be 97% (determined by HPLC using chiral AD-H column, hexane/2-propanol = 90/10, λ = 254 nm, 30 °C, 0.8 mL/min, t<sub>major</sub> = 9.9 min, t<sub>minor</sub> = 15.1 min).



| Peak # | RetTime [min] | Type | Width [min] | Area mAU *s | Height [mAU] | Area %  |
|--------|---------------|------|-------------|-------------|--------------|---------|
| 1      | 10.284        | BB   | 0.5081      | 4396.92383  | 134.47589    | 49.9789 |
| 2      | 15.750        | VB   | 0.8964      | 4400.63086  | 76.88025     | 50.0211 |



| Peak # | RetTime [min] | Type | Width [min] | Area mAU *s | Height [mAU] | Area %  |
|--------|---------------|------|-------------|-------------|--------------|---------|
| 1      | 9.880         | BB   | 0.4679      | 1.16324e4   | 386.16339    | 98.6651 |
| 2      | 15.148        | BP   | 0.6366      | 157.38258   | 2.95870      | 1.3349  |



Prepared according to the procedure within 6 h as white solid (114.5 mg, 98% yield, dr > 20:1); mp 191-194 °C; [α]<sub>D</sub><sup>18</sup> = -214.9 (c 1.08, CH<sub>2</sub>Cl<sub>2</sub>); <sup>1</sup>H NMR (400 MHz, CDCl<sub>3</sub>) δ 10.25 (s, 1H), 8.08–7.74 (m, 6H), 7.54 (m, 7.9 Hz, 2H), 7.46–7.36 (m, 5H), 7.24–7.12 (m, 3H), 7.01–6.85 (m, 5H), 6.72–6.49 (m, 5H), 3.54 (d, J = 13.6 Hz, 1H), 3.18 (d, J = 13.6 Hz, 1H), 1.93 (s, 3H); <sup>13</sup>C NMR (101 MHz, CDCl<sub>3</sub>) δ 179.4, 162.5, 154.4, 137.9, 137.4, 137.0, 135.0, 133.7, 131.6, 131.2, 131.1, 130.2, 130.1, 129.9, 129.3, 129.3, 129.0, 128.8, 128.4, 128.4, 128.1, 127.9, 127.4, 126.4, 126.1, 125.8, 125.6, 123.3, 120.4, 120.2, 115.1, 67.8, 39.4, 21.1; **HRMS** (ESI) m/z

Calcd. for C<sub>41</sub>H<sub>33</sub>N<sub>2</sub>O<sub>2</sub> ([M+H]<sup>+</sup>) 585.2537, Found 585.2548; **Enantiomeric excess** was determined to be 96% (determined by HPLC using chiral AD-H column, hexane/2-propanol = 70/30, λ = 254 nm, 30 °C, 0.8 mL/min, t<sub>major</sub> = 5.5 min, t<sub>minor</sub> = 7.7 min).



| Peak # | RetTime [min] | Type | Width [min] | Area mAU*s | Height [mAU] | Area %  |
|--------|---------------|------|-------------|------------|--------------|---------|
| 1      | 5.541         | VB   | 0.1958      | 8491.03906 | 663.79108    | 50.5426 |
| 2      | 7.755         | VB   | 0.3956      | 8308.71973 | 325.24466    | 49.4574 |



| Peak # | RetTime [min] | Type | Width [min] | Area mAU*s | Height [mAU] | Area %  |
|--------|---------------|------|-------------|------------|--------------|---------|
| 1      | 5.530         | VB   | 0.1932      | 1.67343e4  | 1331.91077   | 98.0112 |
| 2      | 7.743         | VB   | 0.4269      | 339.56851  | 12.18906     | 1.9888  |



Prepared according to the procedure within 6 h as white solid (118 mg, 98% yield, dr > 20:1); mp 95-98 °C;  $[\alpha]_D^{17} = -173.4$  (c 1.01, CH<sub>2</sub>Cl<sub>2</sub>); <sup>1</sup>H NMR (400 MHz, CDCl<sub>3</sub>) δ 10.26 (s, 1H), 8.07-7.74 (m, 6H), 7.61-7.48 (m, 2H), 7.45-7.36 (m, 5H), 7.26-7.15 (m, 3H), 7.00-6.85 (m, 5H), 6.68-6.35 (m, 5H), 3.51 (d, *J* = 13.6 Hz, 1H), 3.50 (s, 3H), 3.15 (d, *J* = 13.6 Hz, 1H); <sup>13</sup>C NMR (101 MHz, CDCl<sub>3</sub>) δ 179.5, 162.5, 159.3, 154.4, 137.2, 137.0, 133.8, 131.6, 131.1, 131.0, 130.6, 130.1, 129.3, 129.3, 129.0, 128.7, 128.5, 128.4, 128.1, 127.8, 127.4, 127.4, 126.4, 126.2, 125.7, 123.3, 120.4, 120.3, 115.1,

113.5, 67.8, 55.0, 39.4; HRMS (ESI) *m/z* Calcd. for C<sub>41</sub>H<sub>33</sub>N<sub>2</sub>O<sub>3</sub> ([M+H]<sup>+</sup>) 601.2486, Found 601.2489; **Enantiomeric excess** was determined to be 96% (determined by HPLC using chiral AD-H column, hexane/2-propanol = 90/10, λ = 254 nm, 30 °C, 0.8 mL/min, *t*<sub>major</sub> = 18.4 min, *t*<sub>minor</sub> = 30.7 min).



| Peak # | RetTime [min] | Type | Width [min] | Area mAU *s | Height [mAU] | Area %  |
|--------|---------------|------|-------------|-------------|--------------|---------|
| 1      | 19.521        | BB   | 1.0760      | 3567.80957  | 47.33147     | 50.8698 |
| 2      | 30.649        | BB   | 1.6938      | 3445.80566  | 29.11583     | 49.1302 |



| Peak # | RetTime [min] | Type | Width [min] | Area mAU *s | Height [mAU] | Area %  |
|--------|---------------|------|-------------|-------------|--------------|---------|
| 1      | 18.386        | BB   | 0.9979      | 2.37522e4   | 329.08377    | 97.8946 |
| 2      | 30.651        | BP   | 1.3910      | 510.82376   | 4.37603      | 2.1054  |



Prepared according to the procedure within 4 h as white solid (121.6 mg, 97% yield, dr > 20:1); mp 123-126 °C;  $[\alpha]_D^{22} = -139.7$  (c 0.54, CH<sub>2</sub>Cl<sub>2</sub>); <sup>1</sup>H NMR (400 MHz, CDCl<sub>3</sub>) δ 10.15 (s, 1H), 8.06 (d, J = 7.6 Hz, 2H), 7.91–7.61 (m, 5H), 7.52–7.36 (m, 6H), 7.30–7.17 (m, 3H), 7.02–6.87 (m, 7H), 6.68 (d, J = 8.1 Hz, 2H), 6.58 (s, 1H), 3.49 (d, J = 13.6 Hz, 1H), 3.17 (d, J = 13.7 Hz, 1H), 1.07 (s, 9H); <sup>13</sup>C NMR (101 MHz, CDCl<sub>3</sub>) δ 179.4, 162.5, 154.1, 151.5, 137.6, 137.0, 133.8, 132.1, 131.8, 131.1, 131.0, 130.2, 129.3, 129.3, 129.1, 129.0, 128.8, 128.7, 128.5, 128.4, 128.1, 127.4, 126.4, 126.3, 125.7, 125.1, 123.3, 120.4, 115.2, 68.0, 39.4, 34.5, 31.0; HRMS (ESI) m/z Calcd. for C<sub>44</sub>H<sub>39</sub>N<sub>2</sub>O<sub>2</sub> ([M+H]<sup>+</sup>) 627.3006, Found 627.3014; **Enantiomeric excess** was determined to be 96% (determined by HPLC using chiral OD-H column, hexane/2-propanol = 60/1, λ = 254 nm, 30 °C, 0.8 mL/min, t<sub>minor</sub> = 10 min, t<sub>major</sub> = 16.8 min).



| Peak # | RetTime [min] | Type | Width [min] | Area mAU *s | Height [mAU] | Area %  |
|--------|---------------|------|-------------|-------------|--------------|---------|
| 1      | 9.746         | BB   | 1.4495      | 9557.80859  | 100.70277    | 48.5441 |
| 2      | 17.030        | BV   | 2.1505      | 1.01311e4   | 62.39738     | 51.4559 |



| Peak # | RetTime [min] | Type | Width [min] | Area mAU *s | Height [mAU] | Area %  |
|--------|---------------|------|-------------|-------------|--------------|---------|
| 1      | 10.035        | VP   | 1.4261      | 609.91162   | 5.04099      | 1.7915  |
| 2      | 16.788        | MM   | 3.6868      | 3.34356e4   | 151.15138    | 98.2085 |



Prepared according to the procedure within 5 h as white solid (116.2 mg, 99% yield, dr > 20:1); mp 87-90 °C;  $[\alpha]_D^{19} = -204.1$  (*c* 1.11, CH<sub>2</sub>Cl<sub>2</sub>); <sup>1</sup>H NMR (400 MHz, CDCl<sub>3</sub>) δ 10.28 (s, 1H), 8.08–7.72 (m, 6H), 7.55–7.36 (m, 7H), 7.26–7.14 (m, 3H), 7.02–6.76 (m, 6H), 6.61–6.40 (m, 4H), 3.54 (d, *J* = 13.6 Hz, 1H), 3.18 (d, *J* = 13.6 Hz, 1H); <sup>13</sup>C NMR (101 MHz, CDCl<sub>3</sub>) δ 179.2, 162.3, 162.2 (d, *J* = 246.2 Hz), 154.4, 137.2 (d, *J* = 7.9 Hz), 136.9, 136.5 (d, *J* = 2.5 Hz), 133.5, 132.0, 131.4, 131.3, 131.2, 129.9, 129.4 (d, *J* = 8.3 Hz), 129.3, 129.3, 129.0, 128.8, 128.6, 128.4, 128.2, 127.5, 126.4 (d, *J* = 26.7 Hz), 125.2, 124.8 (d, *J* = 2.9 Hz), 123.4, 120.4, 120.3, 115.6, 115.4, 115.1 (d, *J* = 21.3 Hz), 114.4, 67.7, 39.4; HRMS (ESI) *m/z* Calcd. for C<sub>40</sub>H<sub>30</sub>FN<sub>2</sub>O<sub>2</sub> ([M+H]<sup>+</sup>) 589.2286, Found 589.2290; **Enantiomeric excess** was determined to be 97% (determined by HPLC using chiral AD-H column, hexane/2-propanol = 70/30, λ = 254 nm, 30 °C, 0.8 mL/min, *t*<sub>major</sub> = 5.9 min, *t*<sub>minor</sub> = 9.5 min).



| Peak # | RetTime [min] | Type | Width [min] | Area mAU *s | Height [mAU] | Area %  |
|--------|---------------|------|-------------|-------------|--------------|---------|
| 1      | 5.935         | VV   | 0.1949      | 8871.14844  | 704.97314    | 50.7447 |
| 2      | 9.490         | PV   | 0.4722      | 8610.76660  | 284.76837    | 49.2553 |



| Peak # | RetTime [min] | Type | Width [min] | Area mAU  | *s | Height [mAU] | Area %  |
|--------|---------------|------|-------------|-----------|----|--------------|---------|
| 1      | 5.925         | VV   | 0.2045      | 2.87493e4 |    | 2164.13843   | 98.6064 |
| 2      | 9.487         | VB   | 0.4836      | 406.31927 |    | 13.22679     | 1.3936  |



Prepared according to the procedure within 5 h as white solid (117 mg, 99% yield, dr > 20:1); mp 97-100 °C;  $[\alpha]_D^{19} = -215.5$  (*c* 0.52, CH<sub>2</sub>Cl<sub>2</sub>); <sup>1</sup>H NMR (400 MHz, CDCl<sub>3</sub>) δ 10.29 (s, 1H), 8.07–7.74 (m, 6H), 7.56–7.51 (m, 2H), 7.48–7.39 (m, 5H), 7.25–7.15 (m, 3H), 7.03–6.86 (m, 5H), 6.73 (m, 2H), 6.59–6.52 (m, 3H), 3.53 (d, *J* = 13.8 Hz, 1H), 3.18 (d, *J* = 13.7 Hz, 1H); <sup>19</sup>F NMR (377 MHz, CDCl<sub>3</sub>) δ -112.33; <sup>13</sup>C NMR (101 MHz, CDCl<sub>3</sub>) δ 179.3, 162.3, 162.1 (d, *J* = 250.4 Hz), 154.5, 136.9, 136.4, 133.56, 131.2, 131.3, 131.3, 131.2, 130.7 (d, *J* = 8.1 Hz), 130.0 (d, *J* = 11.5 Hz), 129.3, 129.2, 129.0, 128.7, 128.5, 128.3, 128.1, 127.4, 126.4, 126.2, 125.3, 123.3, 120.3, 120.2, 115.0 (d, *J* = 21.6 Hz), 114.5, 67.6, 39.4; HRMS (ESI) *m/z* Calcd. for C<sub>40</sub>H<sub>30</sub>FN<sub>2</sub>O<sub>2</sub> ([*M*+*H*]<sup>+</sup>) 589.2286, Found 589.2288; **Enantiomeric excess** was determined to be 96% (determined by HPLC using chiral AD-H column, hexane/2-propanol = 90/10, λ = 254 nm, 30 °C, 0.8 mL/min, *t*<sub>major</sub> = 10.2 min, *t*<sub>minor</sub> = 18.1 min).



| Peak # | RetTime [min] | Type | Width [min] | Area mAU  | *s | Height [mAU] | Area %  |
|--------|---------------|------|-------------|-----------|----|--------------|---------|
| 1      | 10.112        | BB   | 0.6108      | 1.33379e4 |    | 339.77890    | 50.6241 |
| 2      | 17.946        | PB   | 1.0720      | 1.30090e4 |    | 191.17874    | 49.3759 |



| Peak # | RetTime [min] | Type | Width [min] | Area mAU *s | Height [mAU] | Area %  |
|--------|---------------|------|-------------|-------------|--------------|---------|
| 1      | 10.156        | VB   | 0.5833      | 1.48231e4   | 397.70624    | 98.2051 |
| 2      | 18.067        | BB   | 0.8109      | 270.92508   | 3.97620      | 1.7949  |



Prepared according to the procedure within 5 h as white solid (124 mg, 97% yield, dr > 20:1); mp 174-176 °C;  $[\alpha]_D^{20} = -195.6$  (c 0.98, CH<sub>2</sub>Cl<sub>2</sub>); <sup>1</sup>H NMR (400 MHz, CDCl<sub>3</sub>) δ 10.35 (s, 1H), 8.13–7.73 (m, 6H), 7.58–7.35 (m, 7H), 7.31–7.09 (m, 5H), 6.94 (m, 7H), 6.71–6.64 (m, 1H), 3.58 (d, J = 13.4 Hz, 1H), 3.22 (d, J = 13.3 Hz, 1H); <sup>13</sup>C NMR (101 MHz, CDCl<sub>3</sub>) δ 179.1, 162.3, 154.5, 138.5, 136.8, 136.3, 133.4 (q, J = 4.6 Hz), 131.6, 131.4, 131.2, 129.9, 129.7 (q, J = 33.4 Hz), 129.3, 129.3, 129.1, 129.0, 128.9, 128.7, 128.4, 128.2, 127.6, 126.6, 126.4, 125.2, 125.0, 125.0, 125.0, 123.8 (q, J = 272.8 Hz), 123.5, 120.4, 114.3, 67.9, 39.4; **HRMS** (ESI) m/z Calcd. for C<sub>41</sub>H<sub>30</sub>F<sub>3</sub>N<sub>2</sub>O<sub>2</sub> ([M+H]<sup>+</sup>) 639.2254, Found 639.2255; **Enantiomeric excess** was determined to be 96% (determined by HPLC using chiral AD-H column, hexane/2-propanol = 90/10, λ = 254 nm, 30 °C, 0.8 mL/min, t<sub>major</sub> = 10.8 min, t<sub>minor</sub> = 39.4 min).



| Peak # | RetTime [min] | Type | Width [min] | Area mAU *s | Height [mAU] | Area %  |
|--------|---------------|------|-------------|-------------|--------------|---------|
| 1      | 10.840        | VB   | 0.8027      | 1.35220e4   | 258.40549    | 49.5609 |
| 2      | 39.486        | MM   | 3.3704      | 1.37616e4   | 68.05173     | 50.4391 |



| Peak # | RetTime [min] | Type | Width [min] | Area mAU *s | Height [mAU] | Area %  |
|--------|---------------|------|-------------|-------------|--------------|---------|
| 1      | 10.765        | VB   | 0.7838      | 1.53149e4   | 301.29510    | 97.9417 |
| 2      | 39.416        | MM   | 3.2172      | 321.85464   | 1.66734      | 2.0583  |



Prepared according to the procedure within 5 h as white solid (119.7 mg, 99% yield, dr > 20:1); mp 95-98 °C;  $[\alpha]_D^{20} = -202.3$  (c 1.13, CH<sub>2</sub>Cl<sub>2</sub>); <sup>1</sup>H NMR (400 MHz, CDCl<sub>3</sub>) δ 10.28 (s, 1H), 8.05 (d, J = 7.7 Hz, 2H), 7.88 (d, J = 8.9 Hz, 1H), 7.80–7.74 (m, 3H), 7.56–7.38 (m, 7H), 7.27–7.14 (m, 3H), 7.04–6.95 (m, 3H), 6.90–6.80 (m, 4H), 6.68 (d, J = 8.3 Hz, 2H), 6.57 (s, 1H), 3.53 (d, J = 13.7 Hz, 1H), 3.17 (d, J = 13.6 Hz, 1H); <sup>13</sup>C NMR (101 MHz, CDCl<sub>3</sub>) δ 179.2, 162.3, 154.4, 136.8, 136.4, 133.9, 133.6, 133.5, 131.3, 131.2, 131.2, 131.1, 130.1, 129.9, 129.3, 129.2, 129.0, 128.8, 128.6, 128.3, 128.2, 128.1, 127.5, 126.5, 126.2, 125.2, 123.4, 120.3, 120.2, 114.4, 67.7, 39.4; HRMS (ESI) m/z Calcd. for C<sub>40</sub>H<sub>30</sub>ClN<sub>2</sub>O<sub>2</sub> ([M+H]<sup>+</sup>) 605.1990, Found 605.1993; **Enantiomeric excess** was determined to be 97% (determined by HPLC using chiral AD-H column, hexane/2-propanol = 70/30, λ = 254 nm, 30 °C, 0.8 mL/min, t<sub>major</sub> = 7.9 min, t<sub>minor</sub> = 14.7 min).



| Peak # | RetTime [min] | Type | Width [min] | Area mAU *s | Height [mAU] | Area %  |
|--------|---------------|------|-------------|-------------|--------------|---------|
| 1      | 7.979         | BB   | 0.3367      | 2851.47021  | 131.11531    | 50.6480 |
| 2      | 14.741        | BB   | 0.9817      | 2778.50854  | 43.71678     | 49.3520 |



| Peak # | RetTime [min] | Type | Width [min] | Area mAU *s | Height [mAU] | Area %  |
|--------|---------------|------|-------------|-------------|--------------|---------|
| 1      | 7.949         | VB   | 0.3538      | 1.46137e4   | 639.99133    | 98.3523 |
| 2      | 14.694        | BP   | 0.7680      | 244.82127   | 3.85047      | 1.6477  |



Prepared according to the procedure within 12 h as white solid (122 mg, 94% yield, dr > 20:1); mp 183-186 °C;  $[\alpha]_D^{21} = -333.4$  (*c* 1.06, CH<sub>2</sub>Cl<sub>2</sub>); <sup>1</sup>H NMR (400 MHz, CDCl<sub>3</sub>) δ 10.50 (s, 1H), 8.10 (d, *J* = 7.7 Hz, 2H), 7.75 (t, *J* = 8.6 Hz, 3H), 7.68–7.44 (m, 5H), 7.42–7.33 (m, 3H), 7.24–7.15 (m, 4H), 7.04–6.93 (m, 5H), 6.83–6.61 (m, 4H), 3.56 (d, *J* = 13.7 Hz, 1H), 3.25 (d, *J* = 13.7 Hz, 1H); <sup>13</sup>C NMR (101 MHz, CDCl<sub>3</sub>) δ 179.0, 162.4, 155.1, 138.3, 136.8, 135.6, 133.5, 132.5, 131.8, 131.8, 131.2, 131.0, 130.2, 129.8, 129.3, 129.2, 129.0, 128.7, 128.6, 128.3, 128.2, 127.5, 126.7, 126.5, 125.9, 125.3, 123.7, 123.1, 120.5, 119.8, 114.2, 67.5, 39.7; **HRMS** (ESI) *m/z* Calcd. for C<sub>40</sub>H<sub>30</sub>BrN<sub>2</sub>O<sub>2</sub> ([M+H]<sup>+</sup>) 649.1485, Found 649.1484; **Enantiomeric excess** was determined to be 98% (determined by HPLC using chiral AD-H column, hexane/2-propanol = 70/30, λ = 254 nm, 30 °C, 0.8 mL/min, *t*<sub>major</sub> = 5.7 min, *t*<sub>minor</sub> = 11.3 min).



| Peak # | RetTime [min] | Type | Width [min] | Area mAU *s | Height [mAU] | Area %  |
|--------|---------------|------|-------------|-------------|--------------|---------|
| 1      | 5.778         | VV   | 0.2177      | 4358.87549  | 305.01349    | 50.4191 |
| 2      | 11.550        | VB   | 0.9340      | 4286.40576  | 69.60310     | 49.5809 |



| Peak # | RetTime [min] | Type | Width [min] | Area mAU *s | Height [mAU] | Area %  |
|--------|---------------|------|-------------|-------------|--------------|---------|
| 1      | 5.729         | VV   | 0.1880      | 1.51515e4   | 1237.00391   | 98.9850 |
| 2      | 11.257        | BP   | 0.6615      | 155.36160   | 3.00455      | 1.0150  |



Prepared according to the procedure within 5 h as white solid (119.8 mg, 92% yield, dr > 20:1); mp 199-202 °C;  $[\alpha]_D^{21} = -206.0$  (*c* 1.12, CH<sub>2</sub>Cl<sub>2</sub>); <sup>1</sup>H NMR (400 MHz, CDCl<sub>3</sub>) δ 10.30 (s, 1H), 8.07–7.74 (m, 6H), 7.56–7.37 (m, 7H), 7.26–7.15 (m, 3H), 7.03–6.85 (m, 7H), 6.67–6.53 (m, 3H), 3.54 (d, *J* = 13.7 Hz, 1H), 3.19 (d, *J* = 13.7 Hz, 1H); <sup>13</sup>C NMR (101 MHz, CDCl<sub>3</sub>) δ 179.1, 162.2, 154.5, 137.1, 136.8, 136.1, 133.5, 132.3, 132.2, 131.4, 131.3, 131.2, 131.0, 129.8, 129.5, 129.3, 129.2, 129.0, 128.8, 128.6, 128.3, 128.2, 127.5, 126.9, 126.5, 126.3, 125.1, 123.4, 121.9, 120.3, 120.3, 114.3, 67.7, 39.4; **HRMS** (ESI) *m/z*

Calcd. for  $C_{40}H_{30}BrN_2O_2$  ( $[M+H]^+$ ) 649.1485, Found 649.1490; **Enantiomeric excess** was determined to be 97% (determined by HPLC using chiral AD-H column, hexane/2-propanol = 70/30,  $\lambda = 254$  nm, 30 °C, 0.8 mL/min,  $t_{major} = 5.8$  min,  $t_{minor} = 9.3$  min).



| Peak # | RetTime [min] | Type | Width [min] | Area mAU   | Area *s   | Height [mAU] | Area % |
|--------|---------------|------|-------------|------------|-----------|--------------|--------|
| 1      | 5.767         | MM   | 0.2268      | 8918.33203 | 655.34711 | 50.9042      |        |
| 2      | 9.306         | VB   | 0.5093      | 8601.51758 | 263.29315 | 49.0958      |        |



| Peak # | RetTime [min] | Type | Width [min] | Area mAU  | Area *s    | Height [mAU] | Area % |
|--------|---------------|------|-------------|-----------|------------|--------------|--------|
| 1      | 5.772         | VV   | 0.2130      | 1.83296e4 | 1319.40625 | 98.3753      |        |
| 2      | 9.344         | VB   | 0.5064      | 302.72653 | 9.23091    | 1.6247       |        |



Prepared according to the procedure within 7 h as white solid (108 mg, 83% yield, dr > 20:1); mp 83-86 °C;  $[\alpha]_D^{21} = -162.4$  ( $c$  1.01,  $CH_2Cl_2$ );  $^1H$  NMR (400 MHz,  $CDCl_3$ )  $\delta$  10.29 (s, 1H), 8.05 (d,  $J = 7.7$  Hz, 2H), 7.88 (d,  $J = 8.9$  Hz, 1H), 7.80-7.74 (m, 3H), 7.54-7.38 (m, 7H), 7.28 (d,  $J = 7.3$  Hz, 1H), 7.24 (d,  $J = 6.0$  Hz, 1H), 7.17 (t,  $J = 7.7$  Hz, 1H), 7.01-6.86 (m, 7H), 6.61 (d,  $J = 8.2$  Hz, 2H), 6.55 (s, 1H), 3.52 (d,  $J = 13.6$  Hz, 1H), 3.17 (d,  $J = 13.7$  Hz, 1H);  $^{13}C$  NMR (101 MHz,  $CDCl_3$ )  $\delta$  179.1, 162.2, 154.4, 136.8, 136.5, 134.0, 133.5, 131.3, 131.3, 131.2, 131.1, 130.4, 129.9, 129.3, 129.2, 129.0, 128.8, 128.6, 128.3, 128.1, 127.5, 126.5, 126.3, 125.2, 123.4, 122.3, 120.3, 120.3, 114.4, 67.7, 39.4; **HRMS** (ESI)  $m/z$  Calcd. for  $C_{40}H_{30}BrN_2O_2$  ( $[M+H]^+$ ) 649.1485, Found 649.1490; **Enantiomeric excess** was determined to be 93% (determined by HPLC using chiral AD-H column, hexane/2-propanol = 90/10,  $\lambda = 254$  nm, 30 °C, 0.8 mL/min,  $t_{major} = 12.8$  min,  $t_{minor} = 27.7$  min).



| Peak # | RetTime [min] | Type | Width [min] | Area mAU  | Area *s | Height [mAU] | Area %  |
|--------|---------------|------|-------------|-----------|---------|--------------|---------|
| 1      | 12.652        | PB   | 0.7897      | 1.41215e4 |         | 277.77914    | 50.1770 |
| 2      | 27.802        | BB   | 1.7488      | 1.40219e4 |         | 122.37407    | 49.8230 |



| Peak # | RetTime [min] | Type | Width [min] | Area mAU  | Area *s | Height [mAU] | Area %  |
|--------|---------------|------|-------------|-----------|---------|--------------|---------|
| 1      | 12.761        | BB   | 0.6871      | 1.06382e4 |         | 240.85709    | 96.7091 |
| 2      | 27.645        | BP   | 1.5475      | 362.01059 |         | 2.75249      | 3.2909  |



Prepared according to the procedure within 4 h as white solid (188 mg, 96% yield, dr > 20:1); mp 108-110 °C;  $[\alpha]_D^{18} = -117.7$  (*c* 1.81, CH<sub>2</sub>Cl<sub>2</sub>); <sup>1</sup>H NMR (400 MHz, CDCl<sub>3</sub>) δ 10.44 (s, 1H), 8.06–7.70 (m, 6H), 7.53–7.35 (m, 7H), 7.23–7.17 (m, 2H), 7.01–6.83 (m, 8H), 6.73 (d, *J* = 7.5 Hz, 2H), 6.62 (s, 1H), 3.52 (d, *J* = 13.7 Hz, 1H), 3.15 (d, *J* = 13.8 Hz, 1H); <sup>13</sup>C NMR (101 MHz, CDCl<sub>3</sub>) δ 179.3, 162.4, 155.0, 138.2, 136.9, 134.9, 133.5, 131.4, 130.5, 130.5, 130.3, 130.1, 130.0, 129.8, 129.3, 129.0, 129.0, 128.9, 128.4, 128.3, 128.2, 128.2, 127.6, 127.3, 126.6, 121.6, 120.4, 117.1, 115.2, 67.7, 39.4; HRMS (ESI) *m/z* Calcd. for C<sub>40</sub>H<sub>30</sub>BrN<sub>2</sub>O<sub>2</sub> ([M+H]<sup>+</sup>) 649.1485, Found 649.1486; **Enantiomeric excess** was determined to be 98% (determined by HPLC using chiral AD-H column, hexane/2-propanol = 90/10, λ = 254 nm, 30 °C, 0.8 mL/min, *t*<sub>major</sub> = 11.0 min, *t*<sub>minor</sub> = 13.1 min).



| Peak # | RetTime [min] | Type | Width [min] | Area mAU *s | Height [mAU] | Area %  |
|--------|---------------|------|-------------|-------------|--------------|---------|
| 1      | 10.644        | VV   | 0.9299      | 9393.21191  | 159.23003    | 50.8762 |
| 2      | 12.757        | VB   | 0.6692      | 9069.66406  | 211.47977    | 49.1238 |



| Peak # | RetTime [min] | Type | Width [min] | Area mAU *s | Height [mAU] | Area %  |
|--------|---------------|------|-------------|-------------|--------------|---------|
| 1      | 11.010        | BV   | 0.9273      | 1.81964e4   | 297.62833    | 98.8486 |
| 2      | 13.078        | VB   | 0.6613      | 211.94911   | 4.61224      | 1.1514  |



Prepared according to the procedure within 24 h as white solid (67 mg, 39% yield, dr > 20:1); mp 225-226 °C;  $[\alpha]_D^{11} = -109.5$  (c 0.20, CH<sub>2</sub>Cl<sub>2</sub>); <sup>1</sup>H NMR (400 MHz, CDCl<sub>3</sub>) δ 10.01 (s, 1H), 8.10 (d, J = 7.6 Hz, 2H), 7.96 (d, J = 8.9 Hz, 1H), 7.86 (d, J = 8.0 Hz, 1H), 7.77 (d, J = 8.0 Hz, 2H), 7.67 (d, J = 8.5 Hz, 1H), 7.60–7.29 (m, 8H), 7.08–6.61 (m, 10H), 3.48 (d, J = 13.7 Hz, 1H), 3.28 (d, J = 13.7 Hz, 1H); <sup>13</sup>C NMR (101 MHz, CDCl<sub>3</sub>) δ 179.2, 162.1, 154.4, 138.4, 137.0, 133.6, 132.7, 131.7, 131.2, 130.9, 130.7, 130.3, 129.7, 129.2, 129.1, 129.0, 128.8, 128.6, 128.5, 128.2, 127.5, 127.0, 126.4, 125.6, 125.1, 123.5, 120.8, 120.3, 114.2, 67.6, 39.9; HRMS (ESI) m/z Calcd. for C<sub>38</sub>H<sub>29</sub>N<sub>2</sub>O<sub>2</sub>S ([M+H]<sup>+</sup>) 577.1944, Found 577.1926; **Enantiomeric excess** was determined to be 86% (determined by HPLC using chiral OD-H column, hexane/2-propanol = 70/30, λ = 254 nm, 30 °C, 0.8 mL/min, t<sub>minor</sub> = 6.9 min), t<sub>major</sub> = 9.0 min).



| Peak # | RetTime [min] | Type | Width [min] | Area mAU *s | Height [mAU] | Area %  |
|--------|---------------|------|-------------|-------------|--------------|---------|
| 1      | 6.856         | VV   | 0.2946      | 2980.47070  | 152.75111    | 50.4729 |
| 2      | 9.091         | PB   | 0.4304      | 2924.62061  | 102.95380    | 49.5271 |



| Peak # | RetTime [min] | Type | Width [min] | Area mAU *s | Height [mAU] | Area %  |
|--------|---------------|------|-------------|-------------|--------------|---------|
| 1      | 6.876         | VV   | 0.3284      | 695.09583   | 31.90995     | 6.9096  |
| 2      | 8.967         | VB   | 0.4803      | 9364.69922  | 295.59076    | 93.0904 |



Prepared according to the procedure within 7 h as white solid (106 mg, 91% yield, dr > 20:1); mp 198-200 °C;  $[\alpha]_D^{20} = -226.3$  (c 0.40, CH<sub>2</sub>Cl<sub>2</sub>); <sup>1</sup>H NMR (400 MHz, CDCl<sub>3</sub>) δ 10.27 (s, 1H), 8.06–7.75 (m, 6H), 7.58–7.50 (m, 2H), 7.46–7.39 (m, 5H), 7.24 (m, 2H), 7.18–7.13 (m, 1H), 6.95–6.81 (m, 5H), 6.78–6.70 (m, 3H), 6.63–6.60 (m, 2H), 3.51 (d, J = 13.6 Hz, 1H), 3.12 (d, J = 13.6 Hz, 1H), 1.97 (s, 3H); <sup>13</sup>C NMR (101 MHz, CDCl<sub>3</sub>) δ 179.5, 162.5, 154.4, 137.8, 137.6, 136.9, 135.1, 133.5, 131.4, 131.1, 130.2, 130.1, 130.0, 129.2, 129.0, 128.9, 128.6, 128.4, 128.3, 128.1, 128.1, 128.0, 127.9, 126.4, 126.1, 126.0, 125.5, 123.2, 120.4, 120.2, 114.9, 67.7, 39.3, 21.0; HRMS (ESI) m/z Calcd. for C<sub>41</sub>H<sub>33</sub>N<sub>2</sub>O<sub>2</sub> ([M+H]<sup>+</sup>) 585.2537, Found 585.2542; **Enantiomeric excess** was determined to be 96% (determined by HPLC using chiral AD-H column, hexane/2-propanol = 90/10, λ = 254 nm, 30 °C, 0.8 mL/min, t<sub>major</sub> = 7.1 min, t<sub>minor</sub> = 9.0 min).



| Peak # | RetTime [min] | Type | Width [min] | Area mAU *s | Height [mAU] | Area %  |
|--------|---------------|------|-------------|-------------|--------------|---------|
| 1      | 7.090         | VV   | 0.3024      | 9148.93359  | 464.92157    | 50.5022 |
| 2      | 9.004         | VB   | 0.4974      | 8966.97754  | 280.01254    | 49.4978 |



| Peak # | RetTime [min] | Type | Width [min] | Area mAU * s | Height [mAU] | Area %  |
|--------|---------------|------|-------------|--------------|--------------|---------|
| 1      | 7.066         | VV   | 0.2878      | 1.63817e4    | 877.15027    | 97.9032 |
| 2      | 8.999         | VV   | 0.5462      | 350.84537    | 9.52421      | 2.0968  |



Prepared according to the procedure within 9 h as white solid (116 mg, 99% yield, dr > 20:1); mp 117-120 °C;  $[\alpha]_D^{19} = -229.4$  ( $c$  1.06,  $\text{CH}_2\text{Cl}_2$ );  $^1\text{H NMR}$  (400 MHz,  $\text{CDCl}_3$ )  $\delta$  10.26 (s, 1H), 8.09–7.74 (m, 6H), 7.57–7.36 (m, 7H), 7.25–7.09 (m, 3H), 6.93–6.71 (m, 9H), 6.62 (s, 1H), 3.51 (d,  $J = 13.8$  Hz, 1H), 3.14 (d,  $J = 13.7$  Hz, 1H), 2.09 (s, 3H);  $^{13}\text{C NMR}$  (101 MHz,  $\text{CDCl}_3$ )  $\delta$  179.45, 162.54, 154.43, 137.74, 137.00, 136.94, 135.10, 131.43, 131.13, 131.08, 130.52, 130.27, 130.07, 129.27, 129.06, 128.96, 128.84, 128.72, 128.45, 128.38, 128.13, 128.01, 126.39, 126.07, 125.50, 123.25, 120.39, 120.23, 114.96, 67.84, 39.03, 21.01; **HRMS** (ESI)  $m/z$  Calcd. for  $\text{C}_{41}\text{H}_{33}\text{N}_2\text{O}_2$  ( $[\text{M}+\text{H}]^+$ ) 585.2537, Found 585.2539; **Enantiomeric excess** was determined to be 96% (determined by HPLC using chiral AD-H column, hexane/2-propanol = 70/30,  $\lambda = 254$  nm, 30 °C, 0.8 mL/min,  $t_{\text{major}} = 6.8$  min,  $t_{\text{minor}} = 9.8$  min).



| Peak # | RetTime [min] | Type | Width [min] | Area mAU * s | Height [mAU] | Area %  |
|--------|---------------|------|-------------|--------------|--------------|---------|
| 1      | 6.776         | VB   | 0.2534      | 6385.18701   | 390.44424    | 50.2381 |
| 2      | 9.768         | VB   | 0.5722      | 6324.67236   | 172.38377    | 49.7619 |



| Peak # | RetTime [min] | Type | Width [min] | Area mAU *s | Height [mAU] | Area %  |
|--------|---------------|------|-------------|-------------|--------------|---------|
| 1      | 6.769         | VV   | 0.2687      | 2.11955e4   | 1216.88818   | 98.1672 |
| 2      | 9.762         | VV   | 0.6292      | 395.71576   | 9.60375      | 1.8328  |



Prepared according to the procedure within 12 h as white solid (118 mg, 98% yield, dr > 20:1); mp 107-109 °C;  $[\alpha]_D^{18} = -217.5$  (c 0.48, CH<sub>2</sub>Cl<sub>2</sub>); <sup>1</sup>H NMR (400 MHz, CDCl<sub>3</sub>) δ 10.25 (s, 1H), 8.06 (d, J = 7.6 Hz, 2H), 7.90–7.74 (m, 4H), 7.57–7.37 (m, 7H), 7.26–7.11 (m, 3H), 6.90–6.73 (m, 7H), 6.62 (s, 1H), 6.48 (d, J = 8.1 Hz, 2H), 3.56 (s, 3H), 3.48 (d, J = 13.9 Hz, 1H), 3.13 (d, J = 13.9 Hz, 1H); <sup>13</sup>C NMR (101 MHz, CDCl<sub>3</sub>) δ 179.4, 162.5, 158.7, 154.4, 137.8, 137.0, 135.1, 131.4, 131.1, 131.1, 130.3, 130.2, 130.1, 129.3, 129.0, 128.7, 128.4, 128.3, 128.1, 128.0, 126.4, 126.1, 125.6, 125.5, 123.3, 120.4, 120.2, 115.0, 113.5, 67.9, 55.0, 38.6; HRMS (ESI) m/z Calcd. for C<sub>41</sub>H<sub>33</sub>N<sub>2</sub>O<sub>3</sub> ([M+H]<sup>+</sup>) 601.2486, Found 601.2496; **Enantiomeric excess** was determined to be 97% (determined by HPLC using chiral AD-H column, hexane/2-propanol = 70/30, λ = 254 nm, 30 °C, 0.8 mL/min, t<sub>major</sub> = 8.2 min, t<sub>minor</sub> = 12.0 min).



| Peak # | RetTime [min] | Type | Width [min] | Area mAU *s | Height [mAU] | Area %  |
|--------|---------------|------|-------------|-------------|--------------|---------|
| 1      | 8.238         | VB   | 0.3502      | 3113.99365  | 138.24484    | 50.0373 |
| 2      | 12.007        | BB   | 0.7117      | 3109.35205  | 67.92660     | 49.9627 |



| Peak # | RetTime [min] | Type | Width [min] | Area mAU *s | Height [mAU] | Area %  |
|--------|---------------|------|-------------|-------------|--------------|---------|
| 1      | 8.232         | VB   | 0.3354      | 2.27396e4   | 1051.05920   | 98.5335 |
| 2      | 12.005        | VB   | 0.7395      | 338.45093   | 7.29217      | 1.4665  |



Prepared according to the procedure within 6 h as white solid (169 mg, 91% yield, dr > 20:1); mp 106-109 °C;  $[\alpha]_D^{20} = -200.6$  ( $c$  1.02,  $\text{CH}_2\text{Cl}_2$ );  $^1\text{H NMR}$  (400 MHz,  $\text{CDCl}_3$ )  $\delta$  10.03 (s, 1H), 8.10–7.75 (m, 6H), 7.59–7.35 (m, 8H), 7.25–7.05 (m, 6H), 6.91–6.70 (m, 5H), 6.60 (s, 1H), 3.99 (d,  $J = 14.5$  Hz, 1H), 3.82 (d,  $J = 14.7$  Hz, 1H);  $^{13}\text{C NMR}$  (101 MHz,  $\text{CDCl}_3$ )  $\delta$  178.8, 162.3, 154.6, 150.2, 137.9, 136.8, 134.9, 132.3, 132.1, 131.7, 131.6, 131.3, 130.0, 129.4, 129.1, 129.0, 128.8, 128.7, 128.6, 128.5, 128.3, 128.2, 128.1, 126.6, 126.2, 125.4, 124.9, 123.4, 120.2, 120.0, 114.4, 66.9, 33.8; **HRMS** (ESI)  $m/z$  Calcd. for  $\text{C}_{40}\text{H}_{30}\text{N}_3\text{O}_4$  ( $[\text{M}+\text{H}]^+$ ) 616.2231, Found 616.2233; **Enantiomeric excess** was determined to be 98% (determined by HPLC using chiral AD-H column, hexane/2-propanol = 95/5,  $\lambda = 254$  nm, 30 °C, 0.8 mL/min,  $t_{\text{minor}} = 93.3$  min,  $t_{\text{major}} = 117.4$  min).



| Peak # | RetTime [min] | Type | Width [min] | Area mAU *s | Height [mAU] | Area %  |
|--------|---------------|------|-------------|-------------|--------------|---------|
| 1      | 38.766        | BB   | 0.9378      | 1168.57397  | 18.98912     | 6.6695  |
| 2      | 72.491        | BB   | 1.4330      | 1170.78711  | 10.18351     | 6.6821  |
| 3      | 92.604        | MM   | 4.7136      | 7587.95557  | 26.83012     | 43.3072 |
| 4      | 117.049       | MM   | 5.5918      | 7593.92236  | 22.63398     | 43.3412 |



| Peak # | RetTime [min] | Type | Width [min] | Area mAU *s | Height [mAU] | Area %  |
|--------|---------------|------|-------------|-------------|--------------|---------|
| 1      | 93.342        | MM   | 5.0186      | 288.14679   | 9.56934e-1   | 1.1917  |
| 2      | 117.445       | MM   | 5.6971      | 2.38907e4   | 69.89099     | 98.8083 |



Prepared according to the procedure within 23 h as white solid (129 mg, 91% yield, dr > 20:1); mp 73-76 °C;  $[\alpha]_D^{17} = -202.6$  ( $c$  3.31,  $\text{CH}_2\text{Cl}_2$ );  $^1\text{H NMR}$  (400 MHz,  $\text{CDCl}_3$ )  $\delta$  10.11 (s, 1H), 8.02 (d,  $J = 7.3$  Hz, 2H), 7.91 (d,  $J = 8.9$  Hz, 1H), 7.83–7.78 (m, 3H), 7.64 (d,  $J = 8.5$  Hz, 1H), 7.58–7.54 (m, 2H), 7.47–7.41 (m, 5H), 7.31–7.19 (m, 5H), 6.96–6.87 (m, 3H), 6.80 (d,  $J = 7.3$  Hz, 2H), 6.69 (s, 1H), 3.69 (d,  $J = 13.7$  Hz, 1H), 3.25 (d,  $J = 13.7$  Hz, 1H);  $^{19}\text{F NMR}$  (470 MHz,  $\text{CDCl}_3$ )  $\delta$  -63.26;  $^{13}\text{C NMR}$  (101 MHz,  $\text{CDCl}_3$ )  $\delta$  178.6, 161.7, 154.4,

138.1, 136.5, 136.4, 134.8, 131.7, 131.50, 131.4, 131.2, 131.1, 129.6 (q,  $J = 2.8$  Hz), 129.2 (q,  $J = 30.1$  Hz), 129.1, 129.0, 129.0, 128.6, 128.4, 128.1, 127.9, 126.7, 126.3, 125.3, 123.5, 122.74 (q,  $J = 280.1$  Hz), 121.4, 120.1, 119.9, 114.3, 67.0, 38.7; **HRMS** (ESI)  $m/z$  Calcd. for  $C_{42}H_{29}F_6N_2O_2$  ( $[M+H]^+$ ) 707.2128, Found 707.2128; **Enantiomeric excess** was determined to be 94% (determined by HPLC using chiral AD-H column, hexane/2-propanol = 95/5,  $\lambda = 254$  nm, 30 °C, 0.8 mL/min,  $t_{major} = 6.1$  min,  $t_{minor} = 7.7$  min).



| Peak # | RetTime [min] | Type | Width [min] | Area mAU   | Area *s | Height [mAU] | Area %  |
|--------|---------------|------|-------------|------------|---------|--------------|---------|
| 1      | 6.113         | MM   | 0.4552      | 5192.04785 |         | 190.11078    | 49.4343 |
| 2      | 7.734         | MM   | 0.3547      | 5310.88232 |         | 249.55434    | 50.5657 |



| Peak # | RetTime [min] | Type | Width [min] | Area mAU  | Area *s | Height [mAU] | Area %  |
|--------|---------------|------|-------------|-----------|---------|--------------|---------|
| 1      | 6.092         | BV   | 0.4163      | 1.08595e4 |         | 392.12042    | 96.9900 |
| 2      | 7.748         | VP   | 0.3378      | 337.01279 |         | 15.08564     | 3.0100  |



Prepared according to the procedure within 1 h as white solid (129.3 mg, 99% yield, dr > 20:1); mp 189-190 °C;  $[\alpha]_D^{20} = -171.5$  (c 0.40,  $CH_2Cl_2$ );  $^1H$  NMR (400 MHz,  $CDCl_3$ )  $\delta$  10.11 (s, 1H), 8.03 (d,  $J = 7.6$  Hz, 2H), 7.89-7.85 (m, 3H), 7.77 (d,  $J = 8.0$  Hz, 1H), 7.55-7.39 (m, 7H), 7.32-7.22 (m, 3H), 7.13 (t,  $J = 7.7$  Hz, 1H), 7.03-6.83 (m, 6H), 6.76 (d,  $J = 7.6$  Hz, 2H), 6.65 (s, 1H), 3.83 (d,  $J = 14.8$  Hz, 1H), 3.45 (d,  $J = 14.7$  Hz, 1H);  $^{13}C$  NMR (101 MHz,  $CDCl_3$ )  $\delta$  179.0, 162.7, 154.5, 137.7, 137.0,

135.0, 133.9, 133.2, 131.6, 131.2, 131.2, 130.6, 130.4, 130.0, 129.3, 129.0, 129.0, 128.9, 128.7, 128.6, 128.4, 128.2, 128.0, 127.1, 126.4, 126.1, 125.3, 125.2, 123.3, 120.3, 120.1, 114.8, 66.6, 37.6; **HRMS** (ESI)  $m/z$  Calcd. for  $C_{40}H_{30}BrN_2O_2$  ( $[M+H]^+$ ) 649.1485, Found 649.1488; **Enantiomeric excess** was determined to be 98% (determined by HPLC using chiral AD-H column, hexane/2-propanol = 95/5,  $\lambda = 254$  nm, 30 °C, 0.8 mL/min,  $t_{minor} = 28.3$  min,  $t_{major} = 42.5$  min).



| Peak # | RetTime [min] | Type | Width [min] | Area mAU *s | Height [mAU] | Area %  |
|--------|---------------|------|-------------|-------------|--------------|---------|
| 1      | 28.343        | BP   | 2.0102      | 3793.62842  | 22.70831     | 48.7089 |
| 2      | 42.910        | BB   | 2.1695      | 3994.73779  | 21.77478     | 51.2911 |



| Peak # | RetTime [min] | Type | Width [min] | Area mAU *s | Height [mAU] | Area %  |
|--------|---------------|------|-------------|-------------|--------------|---------|
| 1      | 28.329        | MM   | 3.1431      | 172.35883   | 9.13955e-1   | 0.9846  |
| 2      | 42.516        | MM   | 2.8490      | 1.73339e4   | 101.40337    | 99.0154 |



Prepared according to the procedure within 10 h as white solid (119 mg, 92% yield, dr > 20:1); mp 118-120 °C;  $[\alpha]_D^{20} = -204.6$  (*c* 0.54, CH<sub>2</sub>Cl<sub>2</sub>); <sup>1</sup>H NMR (400 MHz, CDCl<sub>3</sub>) δ 10.17 (s, 1H), 8.07–7.73 (m, 6H), 7.48 (m, 7H), 7.24–7.03 (m, 5H), 6.94–6.68 (m, 7H), 6.63 (s, 1H), 3.49 (d, *J* = 13.8 Hz, 1H), 3.11 (d, *J* = 13.8 Hz, 1H); <sup>13</sup>C NMR (101 MHz, CDCl<sub>3</sub>) δ 179.1, 162.2, 154.4, 137.9, 136.8, 135.0, 132.8, 131.4, 131.3, 131.3, 131.2, 131.0, 129.8, 129.7, 129.3, 129.1, 129.0, 128.8, 128.5, 128.3, 128.2, 128.0, 126.6, 126.2, 125.4, 123.4, 121.6, 120.3, 120.2, 114.7, 67.4, 38.7; HRMS (ESI) *m/z* Calcd. for C<sub>40</sub>H<sub>30</sub>BrN<sub>2</sub>O<sub>2</sub> ([M+H]<sup>+</sup>) 649.1485, Found 649.1486; **Enantiomeric excess** was determined to be 96% (determined by HPLC using chiral AD-H column, hexane/2-propanol = 90/10, λ = 254 nm, 30 °C, 0.8 mL/min, *t*<sub>major</sub> = 10.9 min, *t*<sub>minor</sub> = 21.5 min).



| Peak # | RetTime [min] | Type | Width [min] | Area mAU *s | Height [mAU] | Area %  |
|--------|---------------|------|-------------|-------------|--------------|---------|
| 1      | 10.808        | VB   | 0.6565      | 4142.15381  | 98.22169     | 50.7201 |
| 2      | 21.350        | BB   | 1.7031      | 4024.53101  | 33.49734     | 49.2799 |



| Peak # | RetTime [min] | Type | Width [min] | Area mAU *s | Height [mAU] | Area %  |
|--------|---------------|------|-------------|-------------|--------------|---------|
| 1      | 10.854        | VB   | 0.7154      | 1.76952e4   | 386.01068    | 98.1882 |
| 2      | 21.545        | MM   | 1.9334      | 326.51001   | 2.81470      | 1.8118  |



Prepared according to the procedure within 72 h as white solid (79 mg, 64% yield, dr > 20:1); mp 208-211 °C;  $[\alpha]_D^{20} = -157.2$  (c 0.47, CH<sub>2</sub>Cl<sub>2</sub>); <sup>1</sup>H NMR (400 MHz, CDCl<sub>3</sub>) δ 10.59 (s, 1H), 8.09–7.78 (m, 5H), 7.66–7.61 (m, 2H), 7.55–7.41 (m, 5H), 7.36–7.31 (m, 4H), 7.26–7.08 (m, 5H), 7.01–6.77 (m, 7H), 6.63 (s, 1H), 4.27 (d, J = 14.3 Hz, 1H), 3.49 (d, J = 14.3 Hz, 1H); <sup>13</sup>C NMR (101 MHz, CDCl<sub>3</sub>) δ 179.5, 162.6, 154.7, 138.1, 136.5, 135.1, 133.6, 131.8, 131.4, 131.3, 131.1, 130.7, 130.1, 130.0, 129.4, 129.0, 128.8, 128.7, 128.6, 128.4, 128.4, 128.3, 128.2, 128.0, 127.8, 126.3, 126.1, 125.7, 125.6, 125.5, 124.4, 124.0, 123.3, 120.3, 120.3, 114.9, 67.2, 34.4; HRMS (ESI) m/z Calcd. for C<sub>44</sub>H<sub>32</sub>N<sub>2</sub>NaO<sub>2</sub> ([M+Na]<sup>+</sup>) 643.2356, Found 643.2359; **Enantiomeric excess** was determined to be 92% (determined by HPLC using chiral OD-H column, hexane/2-propanol = 95/5, λ = 254 nm, 30 °C, 0.8 mL/min, t<sub>minor</sub> = 10.9 min, t<sub>major</sub> = 18.7 min).



| Peak # | RetTime [min] | Type | Width [min] | Area mAU *s | Height [mAU] | Area %  |
|--------|---------------|------|-------------|-------------|--------------|---------|
| 1      | 10.618        | MM   | 0.9693      | 4935.11133  | 84.85335     | 49.7291 |
| 2      | 18.701        | MM   | 1.0626      | 4988.88672  | 78.25082     | 50.2709 |



| Peak # | RetTime [min] | Type | Width [min] | Area mAU   | Area %  | Height [mAU] |
|--------|---------------|------|-------------|------------|---------|--------------|
| 1      | 10.975        | VB   | 0.7864      | 333.48544  | 3.8043  | 5.92339      |
| 2      | 18.651        | BB   | 1.0303      | 8432.59570 | 96.1957 | 124.74757    |



Prepared according to the procedure within 8 h as white solid (92.3 mg, 93% yield, dr > 20:1); mp 203-206 °C;  $[\alpha]_D^{21} = -107.0$  ( $c$  1.20,  $\text{CH}_2\text{Cl}_2$ );  $^1\text{H}$  NMR (400 MHz,  $\text{CDCl}_3$ )  $\delta$  9.72 (s, 1H), 8.14 (d,  $J = 7.8$  Hz, 2H), 7.90 (d,  $J = 7.2$  Hz, 2H), 7.81 (d,  $J = 8.9$  Hz, 1H), 7.72 (d,  $J = 8.0$  Hz, 1H), 7.51-7.34 (m, 6H), 7.28-7.15 (m, 3H), 7.02-6.80 (m, 4H), 6.73 (d,  $J = 7.4$  Hz, 2H), 6.59 (s, 1H), 1.58 (s, 3H);  $^{13}\text{C}$  NMR (101 MHz,  $\text{CDCl}_3$ )  $\delta$  180.0, 165.1, 154.0, 137.6, 137.4, 135.1, 131.7, 131.1, 130.9, 130.3, 129.8, 129.2, 129.2, 128.9, 128.8, 128.4, 128.3, 128.2, 128.1, 126.2, 126.2, 125.1, 123.2, 120.1, 119.7, 115.0, 61.7, 19.7; HRMS (ESI)  $m/z$  Calcd. for  $\text{C}_{34}\text{H}_{27}\text{N}_2\text{O}_2$  ( $[\text{M}+\text{H}]^+$ ) 495.2067, Found 495.2072; **Enantiomeric excess** was determined to be 63% (determined by HPLC using chiral AD-H column, hexane/2-propanol = 70/30,  $\lambda = 254$  nm, 30 °C, 0.8 mL/min,  $t_{\text{minor}} = 6.5$  min,  $t_{\text{major}} = 10.2$  min).



| Peak # | RetTime [min] | Type | Width [min] | Area mAU  | Area %  | Height [mAU] |
|--------|---------------|------|-------------|-----------|---------|--------------|
| 1      | 6.526         | VB   | 0.2122      | 1.39003e4 | 49.8736 | 1015.17383   |
| 2      | 10.157        | BV   | 0.4065      | 1.39707e4 | 50.1264 | 527.65601    |



| Peak # | RetTime [min] | Type | Width [min] | Area mAU   | Area *s | Height [mAU] | Area %  |
|--------|---------------|------|-------------|------------|---------|--------------|---------|
| 1      | 6.541         | VV   | 0.2313      | 6687.86035 |         | 447.12073    | 18.6921 |
| 2      | 10.179        | BB   | 0.4166      | 2.90913e4  |         | 1063.69214   | 81.3079 |



Prepared according to the procedure within 36 h as white solid (116 mg, 99% yield, dr > 20:1); mp 97-100 °C;  $[\alpha]_D^{20} = -230.8$  (c 0.45, CH<sub>2</sub>Cl<sub>2</sub>); <sup>1</sup>H NMR (400 MHz, CDCl<sub>3</sub>) δ 10.32 (s, 1H), 7.86 (d, J = 8.3 Hz, 3H), 7.77-7.74 (m, 3H), 7.58 (d, J = 8.5 Hz, 1H), 7.43-7.32 (m, 5H), 7.24-7.18 (m, 2H), 7.13 (t, J = 7.6 Hz, 1H), 7.01-6.82 (m, 8H), 6.74 (d, J = 7.0 Hz, 2H), 6.62 (s, 1H), 3.54 (d, J = 13.6 Hz, 1H), 3.21 (d, J = 13.7 Hz, 1H), 2.36 (s, 3H); <sup>13</sup>C NMR (101 MHz, CDCl<sub>3</sub>) δ 179.3, 162.6, 154.5, 138.6, 137.8, 136.9, 135.1, 133.7, 132.1, 131.5, 131.1, 130.2, 130.1, 129.3, 129.0, 128.9, 128.7, 128.5, 128.4, 128.1, 128.0, 127.4, 126.4, 126.4, 125.8, 125.2, 123.2, 120.4, 120.2, 115.0, 67.8, 39.4, 21.6; HRMS (ESI) m/z Calcd. for C<sub>41</sub>H<sub>33</sub>N<sub>2</sub>O<sub>2</sub> ([M+H]<sup>+</sup>) 585.2537, Found 585.2546; **Enantiomeric excess** was determined to be 94% (determined by HPLC using chiral AD-H column, hexane/2-propanol = 70/30, λ = 254 nm, 30 °C, 0.8 mL/min, t<sub>major</sub> = 6.3 min, t<sub>minor</sub> = 7.8 min).



| Peak # | RetTime [min] | Type | Width [min] | Area mAU   | Area *s | Height [mAU] | Area %  |
|--------|---------------|------|-------------|------------|---------|--------------|---------|
| 1      | 6.283         | VV   | 0.2472      | 8163.64063 |         | 511.83102    | 50.3632 |
| 2      | 7.898         | VP   | 0.3757      | 8045.89502 |         | 332.26428    | 49.6368 |



| Peak # | RetTime [min] | Type | Width [min] | Area mAU  | Area *s | Height [mAU] | Area %  |
|--------|---------------|------|-------------|-----------|---------|--------------|---------|
| 1      | 6.257         | VV   | 0.2467      | 1.78486e4 |         | 1122.17419   | 97.1935 |
| 2      | 7.802         | VB   | 0.4532      | 515.37982 |         | 17.93664     | 2.8065  |



3la

Prepared according to the procedure within 12 h as white solid (116 mg, 99% yield, dr > 20:1); mp 98-101 °C;  $[\alpha]_D^{20} = -218.2$  ( $c$  0.62,  $\text{CH}_2\text{Cl}_2$ );  $^1\text{H NMR}$  (400 MHz,  $\text{CDCl}_3$ )  $\delta$  10.33 (s, 1H), 7.86 (d,  $J = 8.2$  Hz, 3H), 7.77–7.74 (m, 3H), 7.58 (d,  $J = 8.6$  Hz, 1H), 7.44–7.31 (m, 5H), 7.24–7.10 (m, 3H), 7.01–6.81 (m, 8H), 6.74 (d,  $J = 7.6$  Hz, 2H), 6.63 (s, 1H), 3.54 (d,  $J = 13.6$  Hz, 1H), 3.21 (d,  $J = 13.7$  Hz, 1H), 2.36 (s, 3H);  $^{13}\text{C NMR}$  (101 MHz,  $\text{CDCl}_3$ )  $\delta$  179.3, 162.6, 154.5, 138.6, 137.8, 136.9, 135.1, 133.7, 132.1, 131.5, 131.1, 130.2, 130.1, 129.3, 129.0, 128.9, 128.7, 128.5, 128.4, 128.1, 128.0, 127.4, 126.4, 126.4, 125.8, 125.2, 123.2, 120.4, 120.3, 115.0, 67.8, 39.4, 21.6; **HRMS** (ESI)  $m/z$  Calcd. for  $\text{C}_{41}\text{H}_{33}\text{N}_2\text{O}_2$  ( $[\text{M}+\text{H}]^+$ ) 585.2537, Found 585.2543; **Enantiomeric excess** was determined to be 94% (determined by HPLC using chiral AD-H column, hexane/2-propanol = 70/30,  $\lambda = 254$  nm, 30 °C, 0.8 mL/min,  $t_{\text{major}} = 6.3$  min,  $t_{\text{minor}} = 8.0$  min).



| Peak # | RetTime [min] | Type | Width [min] | Area mAU *s | Height [mAU] | Area %  |
|--------|---------------|------|-------------|-------------|--------------|---------|
| 1      | 6.318         | VB   | 0.2591      | 4204.78955  | 251.57463    | 51.6161 |
| 2      | 7.976         | VB   | 0.3935      | 3941.49194  | 156.16393    | 48.3839 |



| Peak # | RetTime [min] | Type | Width [min] | Area mAU *s | Height [mAU] | Area %  |
|--------|---------------|------|-------------|-------------|--------------|---------|
| 1      | 6.324         | VV   | 0.2643      | 2.48718e4   | 1459.87610   | 97.0345 |
| 2      | 7.963         | VB   | 0.4713      | 760.10895   | 24.19756     | 2.9655  |



3ma

Prepared according to the procedure within 11 h as white solid (117 mg, 99% yield, dr > 20:1); mp 192-193 °C;  $[\alpha]_D^{20} = -119.8$  ( $c$  0.77,  $\text{CH}_2\text{Cl}_2$ );  $^1\text{H NMR}$  (400 MHz,  $\text{CDCl}_3$ )  $\delta$  9.74 (s, 1H), 7.95–7.66 (m, 5H), 7.55–7.33 (m, 4H), 7.27–7.13 (m, 5H), 7.03 (m, 6H), 6.87 (m, 3H), 6.75–6.65 (m, 3H), 3.41 (d,  $J = 13.8$  Hz, 1H), 3.30 (d,  $J = 13.8$  Hz, 1H);  $^{19}\text{F NMR}$  (470 MHz,  $\text{CDCl}_3$ )  $\delta$  -105.80;  $^{13}\text{C NMR}$  (101 MHz,  $\text{CDCl}_3$ )  $\delta$  179.0, 160.7 (d,  $J = 252.1$  Hz), 153.9, 138.3, 136.8, 135.0, 133.8, 132.6 (d,  $J = 8.8$  Hz), 131.9, 131.4, 131.3, 131.0, 130.0, 129.3, 129.1, 129.0, 128.9, 128.4, 128.3, 128.2, 128.1, 128.1, 127.6, 126.3 (d,  $J = 40.3$  Hz),

124.7, 124.5 (d,  $J = 3.5$  Hz), 123.3, 120.3, 120.0, 119.4 (d,  $J = 11.3$  Hz), 117.3 (d,  $J = 22.7$  Hz), 115.1, 68.7, 39.2 (d,  $J = 5.8$  Hz); **HRMS** (ESI)  $m/z$  Calcd. for  $C_{40}H_{29}FN_2NaO_2$  ( $[M+Na]^+$ ) 611.2105, Found 611.2107; **Enantiomeric excess** was determined to be 96% (determined by HPLC using chiral AD-H column, hexane/2-propanol = 90/10,  $\lambda = 254$  nm, 30 °C, 0.8 mL/min,  $t_{major} = 9.6$  min,  $t_{minor} = 15.8$  min).



| Peak # | RetTime [min] | Type | Width [min] | Area mAU *s | Height [mAU] | Area %  |
|--------|---------------|------|-------------|-------------|--------------|---------|
| 1      | 9.690         | VV   | 0.3823      | 6199.50586  | 250.12845    | 50.8249 |
| 2      | 15.866        | BB   | 0.7307      | 5998.27686  | 127.88545    | 49.1751 |



| Peak # | RetTime [min] | Type | Width [min] | Area mAU *s | Height [mAU] | Area %  |
|--------|---------------|------|-------------|-------------|--------------|---------|
| 1      | 9.602         | VB   | 0.3640      | 1.71856e4   | 732.35138    | 98.2260 |
| 2      | 15.808        | BB   | 0.6924      | 310.37088   | 6.97448      | 1.7740  |



Prepared according to the procedure within 6 h as white solid (122.7 mg, 99% yield, dr > 20:1); mp 109-112 °C;  $[\alpha]_D^{20} = -312.5$  ( $c$  1.07,  $CH_2Cl_2$ );  $^1H$  NMR (400 MHz,  $CDCl_3$ )  $\delta$  10.48 (d,  $J = 3.7$  Hz, 1H), 8.43-8.26 (m, 2H), 7.95-7.88 (m, 3H), 7.82-7.79 (m, 3H), 7.68-7.38 (m, 7H), 7.29-7.18 (m, 2H), 7.07-6.69 (m, 12H), 3.65 (d,  $J = 13.6, 2.7$  Hz, 1H), 3.32 (d,  $J = 13.6$  Hz, 1H);  $^{13}C$  NMR (101 MHz,  $CDCl_3$ )  $\delta$  179.49, 162.35, 154.67, 137.84, 136.93, 135.09, 134.58, 133.70, 132.55, 131.50, 131.27, 130.37, 129.41, 129.30, 129.08, 129.03, 129.00, 128.95, 128.72, 128.64, 128.18, 128.15, 128.00, 127.96, 127.84, 127.44, 127.39, 126.79, 126.78, 126.55, 125.29, 124.21, 123.23, 120.51, 120.36, 114.89, 67.72, 39.69; **HRMS** (ESI)  $m/z$  Calcd. for  $C_{44}H_{33}N_2O_2$  ( $[M+H]^+$ ) 621.2537, Found 621.2538; **Enantiomeric excess** was determined to be 94% (determined by HPLC using chiral IC-H column, hexane/2-propanol = 60/1,  $\lambda = 254$  nm, 30 °C, 0.8 mL/min,  $t_{major} = 10.9$  min,  $t_{minor} = 14.1$  min).



| Peak # | RetTime [min] | Type | Width [min] | Area mAU *s | Height [mAU] | Area %  |
|--------|---------------|------|-------------|-------------|--------------|---------|
| 1      | 10.611        | PB   | 0.5502      | 3204.32959  | 87.06305     | 50.1858 |
| 2      | 13.588        | BBA  | 0.6746      | 3180.60864  | 70.53582     | 49.8142 |



| Peak # | RetTime [min] | Type | Width [min] | Area mAU *s | Height [mAU] | Area %  |
|--------|---------------|------|-------------|-------------|--------------|---------|
| 1      | 10.895        | VB   | 0.7897      | 5.91353e4   | 1103.50232   | 97.2484 |
| 2      | 14.100        | BV   | 1.0672      | 1673.18726  | 21.14826     | 2.7516  |



Prepared according to the procedure within 6 h as white solid (108 mg, 94% yield, dr > 20:1); mp 182-184 °C;  $[\alpha]_D^{21} = -251.3$  (c 0.96, CH<sub>2</sub>Cl<sub>2</sub>); <sup>1</sup>H NMR (400 MHz, CDCl<sub>3</sub>) δ 10.11 (s, 1H), 7.87–7.62 (m, 6H), 7.51–7.34 (m, 4H), 7.25–7.10 (m, 4H), 7.03–6.96 (m, 3H), 6.93–6.84 (m, 5H), 6.80–6.68 (m, 3H), 3.49 (d, J = 13.6 Hz, 1H), 3.04 (d, J = 13.6 Hz, 1H); <sup>13</sup>C NMR (101 MHz, CDCl<sub>3</sub>) δ 178.6, 158.8, 154.3, 137.8, 136.7, 135.0, 133.9, 133.6, 131.5, 131.1, 130.4, 130.2, 129.6, 129.3, 129.1, 129.0, 128.6, 128.3, 128.2, 128.1, 127.6, 127.5, 126.5, 126.3, 125.2, 123.4, 120.4, 120.3, 115.1, 67.9, 39.2; HRMS (ESI) m/z Calcd. for C<sub>38</sub>H<sub>29</sub>N<sub>2</sub>O<sub>2</sub>S ([M+H]<sup>+</sup>) 577.1944, Found 577.1949; **Enantiomeric excess** was determined to be 97% (determined by HPLC using chiral AD-H column, hexane/2-propanol = 70/30, λ = 254 nm, 30 °C, 0.8 mL/min, t<sub>major</sub> = 7.5 min, t<sub>minor</sub> = 14.3 min).



| Peak # | RetTime [min] | Type | Width [min] | Area mAU   | Area *s | Height [mAU] | Area %  |
|--------|---------------|------|-------------|------------|---------|--------------|---------|
| 1      | 7.496         | VB   | 0.3034      | 4810.35742 |         | 243.39771    | 51.4837 |
| 2      | 14.306        | BB   | 0.7547      | 4533.10107 |         | 93.53902     | 48.5163 |



| Peak # | RetTime [min] | Type | Width [min] | Area mAU  | Area *s | Height [mAU] | Area %  |
|--------|---------------|------|-------------|-----------|---------|--------------|---------|
| 1      | 7.478         | VB   | 0.2943      | 2.42658e4 |         | 1278.25842   | 98.6672 |
| 2      | 14.278        | BV   | 0.7328      | 327.79517 |         | 6.90631      | 1.3328  |



Prepared according to the procedure within 24 h as white solid (90 mg, 86% yield, dr > 20:1); mp 209-212 °C;  $[\alpha]_D^{20} = -69.5$  (*c* 1.56, CH<sub>2</sub>Cl<sub>2</sub>); <sup>1</sup>H NMR (400 MHz, CDCl<sub>3</sub>) δ 9.73 (s, 1H), 7.87–7.65 (m, 5H), 7.39–7.35 (m, 4H), 7.23–7.08 (m, 5H), 7.00–6.75 (m, 7H), 6.54 (s, 1H), 3.13 (d, *J* = 13.5 Hz, 1H), 3.06–3.03 (m, 1H), 2.83–2.73 (m, 1H), 2.66 (d, *J* = 13.6 Hz, 1H), 1.41 (d, *J* = 7.5 Hz, 3H); <sup>13</sup>C NMR (101 MHz, CDCl<sub>3</sub>) δ 179.02, 168.03, 153.61, 137.27, 137.06, 134.79, 133.73, 132.86, 130.72, 130.36, 129.00, 128.88, 128.86, 128.75, 128.26, 128.18, 127.46, 127.00, 126.03, 123.25, 123.04, 120.35, 120.05, 115.52, 68.70, 38.84, 22.56, 9.27; HRMS (ESI) *m/z* Calcd. for C<sub>36</sub>H<sub>30</sub>N<sub>2</sub>NaO<sub>2</sub> ([M+Na]<sup>+</sup>) 545.2199, Found 545.2204; **Enantiomeric excess** was determined to be 84% (determined by HPLC using chiral IC-H column, hexane/2-propanol = 95/5, λ = 254 nm, 30 °C, 0.8 mL/min, *t*<sub>major</sub> = 7.4 min, *t*<sub>minor</sub> = 8.1 min).



| Peak # | RetTime [min] | Type | Width [min] | Area mAU   | Area *s | Height [mAU] | Area %  |
|--------|---------------|------|-------------|------------|---------|--------------|---------|
| 1      | 7.173         | VV   | 0.2035      | 4806.06982 |         | 357.33591    | 47.1140 |
| 2      | 7.737         | VB   | 0.0626      | 5394.87549 |         | 1310.58862   | 52.8860 |



| Peak # | RetTime [min] | Type | Width [min] | Area mAU   | Height [mAU] | Area %  |
|--------|---------------|------|-------------|------------|--------------|---------|
| 1      | 7.385         | VV   | 0.2112      | 5074.84521 | 366.23849    | 91.9729 |
| 2      | 8.052         | VB   | 0.0679      | 442.91916  | 99.55677     | 8.0271  |

### Gram scale synthesis of compound 3aa



In a Schlenk tube, pyrazol-5-ones **1a** (783.4 mg, 2.4 mmol, 1.2 eq), **C5** (129 mg, 0.2 mmol, 0.1 eq) were added into  $\text{CHCl}_3$  (20 mL) under argon atmosphere. Then ortho-alkynyl naphthol **2a** (488.6 mg, 2.0 mmol, 1.0 eq) was added in one portion and the reaction solution was stirred at 25 °C. After the reaction was complete (monitored by TLC), the solvent was removed under vacuum, the residue was purified by column chromatography on silica gel (petroleum ether/EtOAc = 10/1 was used as the eluent) directly to give the product **3aa** (93% yield).

**Enantiomeric excess** was determined to be 97% (determined by HPLC using chiral AD-H column, hexane/2-propanol = 90/10,  $\lambda = 254 \text{ nm}$ , 30 °C, 0.8 mL/min,  $t_{\text{major}} = 9.9 \text{ min}$ ,  $t_{\text{minor}} = 15.0 \text{ min}$ ).



| Peak # | RetTime [min] | Type | Width [min] | Area mAU   | Height [mAU] | Area %  |
|--------|---------------|------|-------------|------------|--------------|---------|
| 1      | 10.284        | BB   | 0.5081      | 4396.92383 | 134.47589    | 49.9789 |
| 2      | 15.750        | VB   | 0.8964      | 4400.63086 | 76.88025     | 50.0211 |



| Peak # | RetTime [min] | Type | Width [min] | Area mAU *s | Height [mAU] | Area %  |
|--------|---------------|------|-------------|-------------|--------------|---------|
| 1      | 9.872         | BB   | 0.6454      | 1.05649e4   | 256.32065    | 98.6260 |
| 2      | 14.947        | BP   | 0.6569      | 147.18102   | 2.66723      | 1.3740  |

### X-ray structures of 3ha



**3ha**

CCDC deposition number: 2012517

## 7. References

- (a) P. E. Gagnon, J. L. Boivin, R. J. Paquin, *Can. J. Chem.*, 1953, **31**, 1025-1039; (b) H. Nakagawa, R. Ohya, A. Kimata, T. Suzuki and N. Miyata, *Bioorg. Med. Chem. Lett.*, 2006, **16**, 5939-5942; (c) Y.-H. Liao, W.-B. Chen, Z.-J. Wu, X.-L. Du, L.-F. Cun, X.-M. Zhang and W.-C. Yuan, *Adv. Synth. Catal.*, 2010, **352**, 827-832; (d) Z. Wang, Z. Yang, D. Chen, X. Liu, L. Lin and X. Feng, *Angew. Chem., Int. Ed.*, 2011, **50**, 4928-4932; (e) X. Bao, S. Wei, L. Zou, Y. He, F. Xue, J. Qu, and B. Wang, 2016, **52**, 11426-11429; (f) X. Sheng, J. Zhang, H. Yang and G. Jiang, *Org. Lett.*, 2017, **19**, 2618-2621.
- (a) S. Jia, Z. Chen, N. Zhang, Y. Tan, Y. Liu, J. Deng and H. Yan, *J. Am. Chem. Soc.*, 2018, **140**, 7056-7060; (b) D. Li, Y. Tan, L. Peng, S. Li, N. Zhang, Y. Liu and H. Yan, *Org. Lett.*, 2018, **20**, 4959-4963; (c) A. Huang, L. Zhang, D. Li, Y. Liu, H. Yan and W. Li, *Org. Lett.*, 2019, **21**, 95-99; (d) Y.-B. Wang, P. Yu, Z.-P. Zhou, J. Zhang, J. Wang, S.-H. Luo, Q.-S. Gu, K. N. Houk and B. Tan, *Nat. Catal.*, 2019, **2**, 504-513; (e) T. Xu, K. Chen, H.-Y. Zhu, W.-J. Hao, S.-J. Tu and B. Jiang, *Org. Lett.*, 2020, **22**, 2414-2418.
- S. D. Pozo, S. Vera, M. Oiarbide and C. Palomo, *J. Am. Chem. Soc.*, 2017, **139**, 15308-15311.

## 8. NMR spectra for compounds
